# Supplementary material for: The Measurement Error Proxy System Model: MEPSM v0.2
Source: Copernicus journal article supplement (doi:10.5194/gmd-17-6745-2024), 2024-09-12
Supplement: Supplementary file 1 [file gmd-17-6745-2024-supplement.pdf]

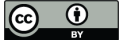

*Supplement of*

## **The Measurement Error Proxy System Model: MEPSM v0.2**

**Matt J. Fischer**

*Correspondence to:* Matt J. Fischer ([mjf@ansto.gov.au](mailto:mjf@ansto.gov.au))

The copyright of individual parts of the supplement might differ from the article licence.

# RI6prep

Matt Fischer

March 21, 2023

```
[1]: import Cairo
using CSV, DataFrames, Dates, Statistics, MAT
using Gadfly
```

```
[2]: ENV["COLUMNS"] = 300
```

```
[2]: 300
```

```
[3]: a = matread(expanduser("~/Ddrv/Data/PAGES/CoralHydro2k1_0_0.mat"))["TS"];
```

```
[4]: # "paleoData_hasResolution_hasMeanValue", "paleoData_samplingResolution", "yearUnits", "datasetId", _
    ↪ "paleoData_notes"

col_str=[ "dataSetName", "archiveType", "geo_meanElev", "geo_meanLat", "geo_meanLon", "paleoData_coralHydro2kGroup", _
    ↪ "hasResolution_nominal",
    "paleoData_variableName", "paleoData_units", "paleoData_analyticalError"
]
```

```
[4]: 10-element Vector{String}:
 "dataSetName"
 "archiveType"
 "geo_meanElev"
 "geo_meanLat"
 "geo_meanLon"
 "paleoData_coralHydro2kGroup"
 "hasResolution_nominal"
 "paleoData_variableName"
 "paleoData_units"
 "paleoData_analyticalError"
```

```
[5]: Ds0 = DataFrame(Dict(k=>vec(v) for (k,v) in a if in(k, col_str)))
Ds0 = ifelse.(isempty.(Ds0), missing, Ds0)
Dsite = Ds0[Ds0.paleoData_variableName.!="year",:]
Dsite.lon2 = Dsite.geo_meanLon + (Dsite.geo_meanLon.<0.)*360
first(Dsite, 6)
```

```
[5]:
```

|   | archiveType | dataSetName | geo_meanElev | geo_meanLat | geo_meanLon | hasResolution_nominal | paleoData_analyticalError | paleoData_coralHydro2kGroup | paleoData_units | paleoData_variableName |
|---|-------------|-------------|--------------|-------------|-------------|-----------------------|---------------------------|-----------------------------|-----------------|------------------------|
| 1 | coral       | AB08MEN01   | -6.0         | -0.13       | 98.52       | monthly               | 0.07                      | 4.0                         | permil          | d180                   |
| 2 | coral       | AB15BH01    | -0.5         | -6.53       | 105.63      | monthly               | 0.049                     | 4.0                         | permil          | d180                   |
| 3 | coral       | AB20MEN01   | -0.7         | -3.18       | 100.517     | monthly               | 0.05                      | 4.0                         | permil          | d180                   |
| 4 | coral       | AB20MEN02   | missing      | -2.37       | 99.745      | monthly               | 0.05                      | 4.0                         | permil          | d180                   |
| 5 | coral       | AB20MEN03   | missing      | -3.126      | 100.309     | monthly               | 0.05                      | 4.0                         | permil          | d180                   |
| 6 | coral       | AB20MEN04   | missing      | -2.752      | 99.995      | monthly               | 0.05                      | 4.0                         | permil          | d180                   |

```
[6]: # extrema(Dsite.lon2)
```

```
[7]: i1 = Dsite.dataSetName .== "OS14RIP01"
Dri = Dsite[i1, :]
Dri.daterange = [[Date(1950,2), Date(2008, 3)]]
Dri
```

```
[7]:
```

|   | archiveType | dataSetName | geo_meanElev | geo_meanLat | geo_meanLon | hasResolution_nominal | paleoData_analyticalError | paleoData_coralHydro2kGroup | paleoData_units | paleoData_variableName |
|---|-------------|-------------|--------------|-------------|-------------|-----------------------|---------------------------|-----------------------------|-----------------|------------------------|
| 1 | coral       | OS14RIP01   | -2.0         | 7.2708      | 134.384     | monthly               | 0.05                      | 4.0                         | permil          | d180                   |

```
[8]: module aa

using DataFrames, Dates, Statistics
import Measurements as Mm
import Measurements: ±

function readTS(s::String, a)
    i = a["dataSetName"].==s
    z = a["paleoData_values"][i]
    derr = Dict(k=>v for (k, v) in zip(a["paleoData_variableName"][i], a["paleoData_analyticalError"][i]))
```

```

@show derr
time = z[2][:]
date1 = datef(time)
D = DataFrame(id=s, date=date1, t=time, y=z[1][:] .± derr["d180"])
return D
# return D[D.t.>1950,:]
end

function datef(time::AbstractVector)
y = floor.(Int, time)
m = (time-y) .÷ median(diff(time)) .+ 1
return Date.(y,m)
end
end

```

[8]: Main.aa

```

[9]: D0c = aa.readTS("OS14RIP01", a)
@show size(D0c)
first(D0c, 6)

```

```

derr = Dict{String, Any}("year" => "NA", "d180" => 0.05)
size(D0c) = (1309, 4)

```

```

[9]:

```

|   | id        | date       | t       | y             |
|---|-----------|------------|---------|---------------|
|   | String    | Date       | Float64 | Measurme_     |
| 1 | OS14RIP01 | 1899-03-01 | 1899.17 | -5.546 ± 0.05 |
| 2 | OS14RIP01 | 1899-04-01 | 1899.25 | -5.729 ± 0.05 |
| 3 | OS14RIP01 | 1899-05-01 | 1899.33 | -5.892 ± 0.05 |
| 4 | OS14RIP01 | 1899-06-01 | 1899.42 | -5.792 ± 0.05 |
| 5 | OS14RIP01 | 1899-07-01 | 1899.5  | -5.728 ± 0.05 |
| 6 | OS14RIP01 | 1899-08-01 | 1899.58 | -5.676 ± 0.05 |

[10]: Dri

```

[10]:

```

|   | archiveType | dataSetName | geo_meanElev | geo_meanLat | geo_meanLon | hasResolution_nominal | paleoData_analyticalError | paleoData_coralHydro2kGroup | paleoData_units | paleoData_variableName |
|---|-------------|-------------|--------------|-------------|-------------|-----------------------|---------------------------|-----------------------------|-----------------|------------------------|
|   | String      | String      | Float64?     | Float64     | Float64     | String?               | Any                       | Any                         | String          | String                 |
| 1 | coral       | OS14RIP01   | -2.0         | 7.2708      | 134.384     | monthly               | 0.05                      | 4.0                         | permil          | d180                   |

[11]: module t

```

using DataFrames, Dates, Statistics
using Rasters
using Rasters: Between
import Rasters.DimensionaLData as DD
import Measurements as Mm
import Measurements: ±

function oceandata(fname::String, varname::String; Dsite=DataFrame(), k=Date[], f1="")
    fname = f1*fname
    f2 = splitdir(fname)[2]
    valname = Symbol(split(f2, '.')[1])
    ds0 = Raster(fname, key=varname)
    ds = set(ds0, Ti⇒DD.Points)
    if isempty(k)
        k = [[Date(year(x[1]), month(x[1]), 1), Date(year(x[2]), month(x[2]), 28)] for x in Dsite.daterange]
    end
    lonmax = maximum(dims(ds, X))
    sitelon = lonmax>180 ? Dsite.lon2 : Dsite.geo_meanLon
    dsst = [DataFrame(id=id, date=t1[1]:Month(1):t1[2], t=timef(t1),
        sst=vec(read(view(ds, X(Near(x)), Y(Near(y)), Ti(Between(t2...))))))
        for (id, x, y, t1, t2) in zip(Dsite.dataSetName, sitelon, Dsite.geo_meanLat, Dsite.daterange, k)]
    D2 = reduce(vcat, dsst)
    if any(skipmissing(D2.sst.<0.0))
        allowmissing!(D2, :sst)
        D2[findall(skipmissing(D2.sst.<0.0)), :sst] .= missing
    end
    if any(skipmissing(D2.sst.==0.0))
        D3 = combine(groupby(D2, :id), [:t, :sst]⇒seasonalize⇒:y)
        D2[:, :sst] = D3.y
    end
    rename!(D2, :sst⇒valname)
    return D2
end
end

```

```

function timef(tv::Vector{Date})
    date1 = tv[1]:Month(1):tv[2]
    return year.(date1) + month.(date1)./12 .- 1/24
end

function createDF1(Dsn::DataFrame; Dsite=DataFrame(), f1="")
    Dz = oceandata.(Dsn.file, Dsn.var, Dsite=Dsite, f1=f1)
    D1 = Dz[1]
    vname = propertynames(D1)[end]
    goodi = .!ismissing.(Dz[2][:,end])
    D2 = copy(D1[goodi,:])
    D2[!, vname] = D1[goodi, end] .± Dz[2][goodi, end]
    vnamea = Symbol(vname, "a")
    return D2
end

function seb(X::Vector, mse::Float64)
    μx = mean(X)
    svb = mse / sum(abs2, X.-μx)
    return sqrt.(svb)
end

function detrend(t1::AbstractVector, Yo::AbstractVector)
    X = [ones(length(t1)) t1.-mean(t1)] # no error in X
    n, p = size(X)
    Xt = permutedims(X)
    Y = Mm.value.(Yo)
    b = Xt*X \ Xt*Y
    mse = sum(abs2, Y - X*b)/(n-p)
    b2 = b[2] ± seb(X[:,2], mse)
    @show b2
    Yh = X[:,2]*b2
    return Yo-Yh
end
end
end

```

[11]: Main.t

```

[12]: f4 = expanduser("~/Ddrv/Data/Oceans/Salinity/")
Dsssn = DataFrame(file=["HadEN4.2.1g10_190001-201012.nc", "HadEN4.2.1g10_sss_uct.nc"], var=["sss", "salt_err_std"])
Dsss = t.createDF1(Dsssn, Dsite=Dri, f1=f4)
first(Dsss, 4)

```

```

[12]:

```

|   | id        | date       | t       | HadEN4       |
|---|-----------|------------|---------|--------------|
|   | String    | Date       | Float64 | Measurem.    |
| 1 | OS14RIP01 | 1950-02-01 | 1950.12 | 34.03 ± 0.17 |
| 2 | OS14RIP01 | 1950-03-01 | 1950.21 | 34.01 ± 0.17 |
| 3 | OS14RIP01 | 1950-04-01 | 1950.29 | 33.98 ± 0.17 |
| 4 | OS14RIP01 | 1950-05-01 | 1950.38 | 33.95 ± 0.17 |

```

[13]: f1 = expanduser("~/Ddrv/Data/SST/")
Dsstn = DataFrame(file=["ersstv5.nc", "ersstev5.nc"], var=["sst", "ut"])

Dsst = t.createDF1(Dsstn, Dsite=Dri, f1=f1)
first(Dsst, 4)

```

```

[13]:

```

|   | id        | date       | t       | ersstv5      |
|---|-----------|------------|---------|--------------|
|   | String    | Date       | Float64 | Measurem.    |
| 1 | OS14RIP01 | 1950-02-01 | 1950.12 | 28.15 ± 0.31 |
| 2 | OS14RIP01 | 1950-03-01 | 1950.21 | 28.35 ± 0.27 |
| 3 | OS14RIP01 | 1950-04-01 | 1950.29 | 28.92 ± 0.29 |
| 4 | OS14RIP01 | 1950-05-01 | 1950.38 | 29.1 ± 0.27  |

```

[14]: Docn = innerjoin(Dsst, Dsss[:, Not(:t)], D0c[:, Not(:t)], on=[:id, :date])
@show size(Docn)
first(Docn, 4)

```

size(Docn) = (695, 6)

[14]:

|   | id        | date       | t       | ersstv5      | HadEN4       | y             |
|---|-----------|------------|---------|--------------|--------------|---------------|
|   | String    | Date       | Float64 | Measurem_    | Measurem_    | Measurem_     |
| 1 | OS14RIP01 | 1950-02-01 | 1950.12 | 28.15 ± 0.31 | 34.03 ± 0.17 | -5.562 ± 0.05 |
| 2 | OS14RIP01 | 1950-03-01 | 1950.21 | 28.35 ± 0.27 | 34.01 ± 0.17 | -5.579 ± 0.05 |
| 3 | OS14RIP01 | 1950-04-01 | 1950.29 | 28.92 ± 0.29 | 33.98 ± 0.17 | -5.804 ± 0.05 |
| 4 | OS14RIP01 | 1950-05-01 | 1950.38 | 29.1 ± 0.27  | 33.95 ± 0.17 | -5.871 ± 0.05 |

[ ]:

```
[15]: Dv = select(Docn, :t, [4:6;].=>ByRow(t.Mm.value), renamecols=false)
Dvl = stack(Dv, Not(:t));
```

```
[16]: yglabs = Dict("ersstv5"=>"SST (°C)", "HadEN4"=>"SSS (psu)", "y"=>"δ18O (‰)")
```

```
p1 = plot(Dvl, x=:t, y=:value, ygroup=:variable, color=:variable,
Geom.subplot_grid(Geom.line, free_y_axis=true),
Scale.ygroup(labels=i->yglabs[i]),
Guide.ylabel(nothing),
Theme(key_position=:none)
)
draw(PNG(6inch, 5inch), p1)
```

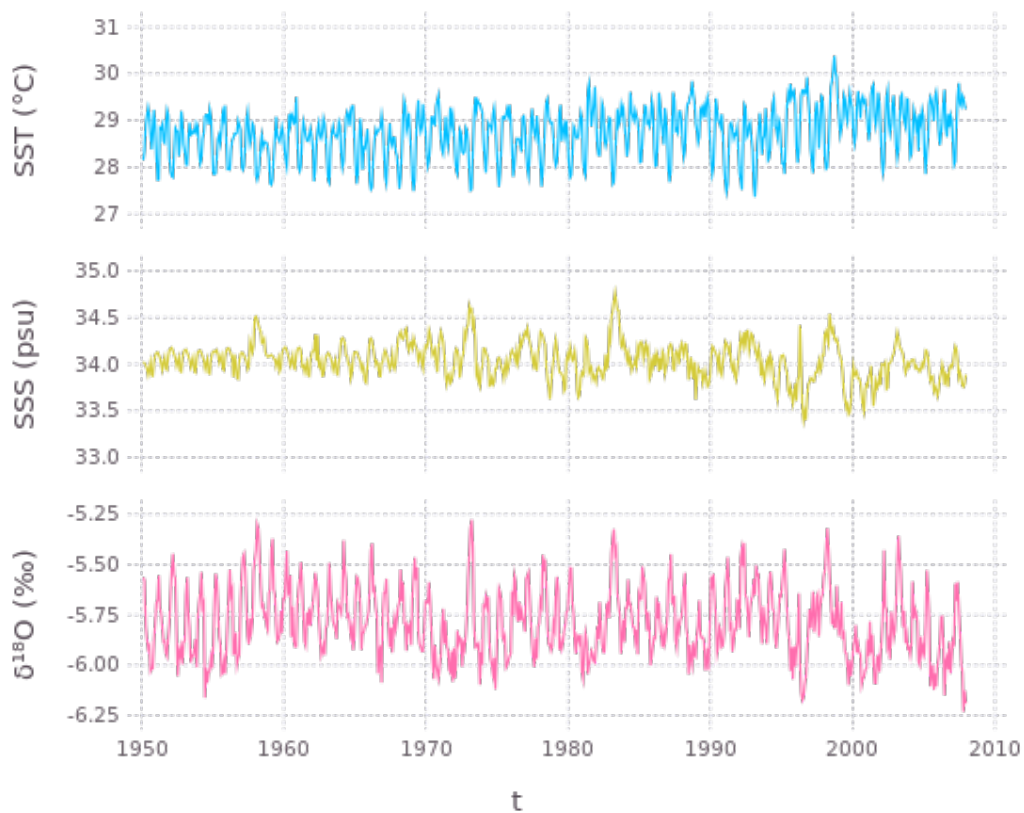

[16]: false

[ ]:

```
[17]: Docna = select(Docn, :t, [4:6;].=>(y->t.detrend(Docn.t, y))=>x->string(x,"a"))
Dv2 = select(Docna, :t, [2:4;].=>ByRow(t.Mm.value), renamecols=false)
Dv2l = stack(Dv2, Not(:t)) ;
```

```
b2 = 0.0098 ± 0.0012
b2 = -0.00295 ± 0.00042
b2 = -0.00135 ± 0.00039
```

```
[18]: yglabs = Dict("ersstv5a" => "SSTa (°C)", "HadEN4a" => "SSSa (psu)", "ya" => "δ18Oa (‰)")
```

```
p2 = plot(Dv2l, x=:t, y=:value, ygroup=:variable, color=:variable,  
  Geom.subplot_grid(Geom.line, free_y_axis=true),  
  Scale.ygroup(labels=i->yglabs[i]),  
  Guide.ylabel(nothing),  
  Theme(key_position=:none)  
)  
draw(PNG(6inch, 5inch), p2)
```

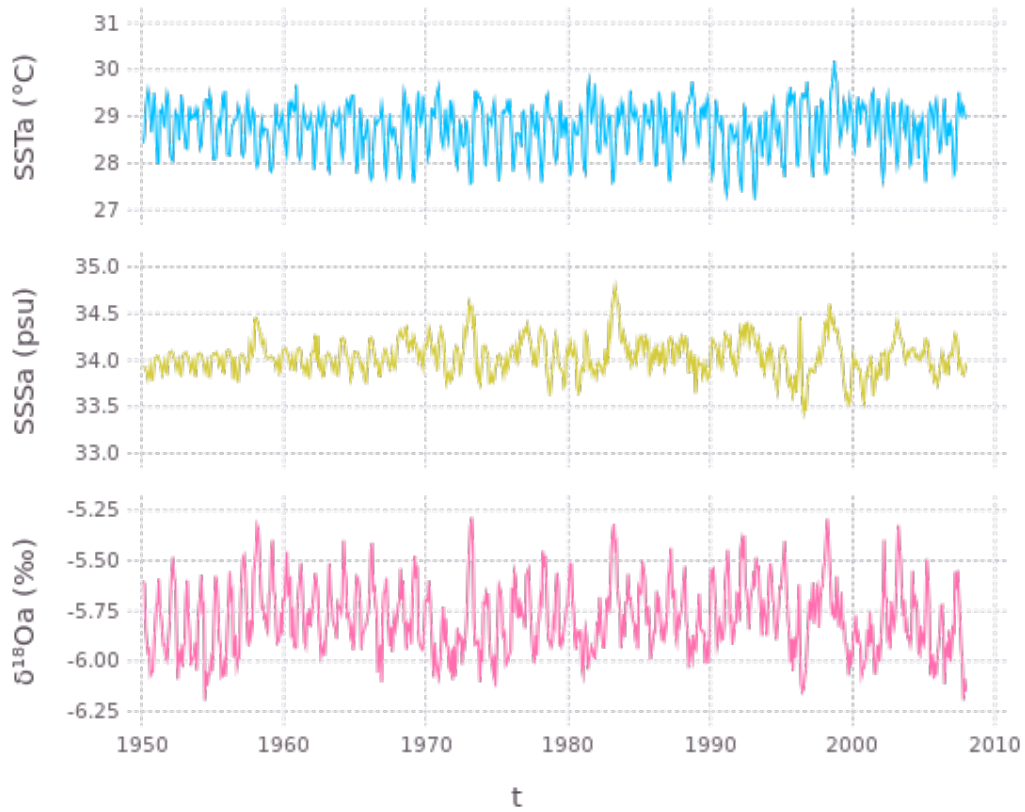

```
[18]: false
```

```
[19]: # CSV.write("./Data/Docna_1950_v100.csv", Docna)  
      # CSV.write("./Data/Palaui.csv", Docna)
```

```
[ ]:
```

```
[ ]:
```

```
[ ]:
```

```
[ ]:
```

```
[ ]:
```
